# Supplementary material for: In Vitro and In Silico Potential Inhibitory Effects of New Biflavonoids from Ochna rhizomatosa on HIV-1 Integrase and Plasmodium falciparum
Source: MDPI journal article supplement (doi:10.3390/pharmaceutics14081701), 2022-08-15
Supplement: s1 [file s1]

Article

# In Vitro and In Silico Potential Inhibitory Effects of New Biflavonoids from *Ochna rhizomatosa* on HIV-1 Integrase and *Plasmodium falciparum*

Angélique Nicolas Messi <sup>1,2,3,\*</sup>, Susan Lucia Bonnet <sup>2</sup>, Brice Ayissi Owona <sup>4</sup>, Anke Wilhelm <sup>2</sup>, Eutrophe Le Doux Kamto <sup>1</sup>, Joseph Thierry Ndongo <sup>5</sup>, Xavier Siwe-Noundou <sup>6,\*</sup>, Madan Poka <sup>6</sup>, Patrick H. Demana <sup>6</sup>, Rui W. M. Krause <sup>7</sup>, Joséphine Ngo Mbing <sup>1</sup>, Dieudonné Emmanuel Pegnyemb <sup>1</sup> and Christian G. Bochet <sup>3</sup>

## NMR Data of the new isolated biflavonoids

### Compound 1

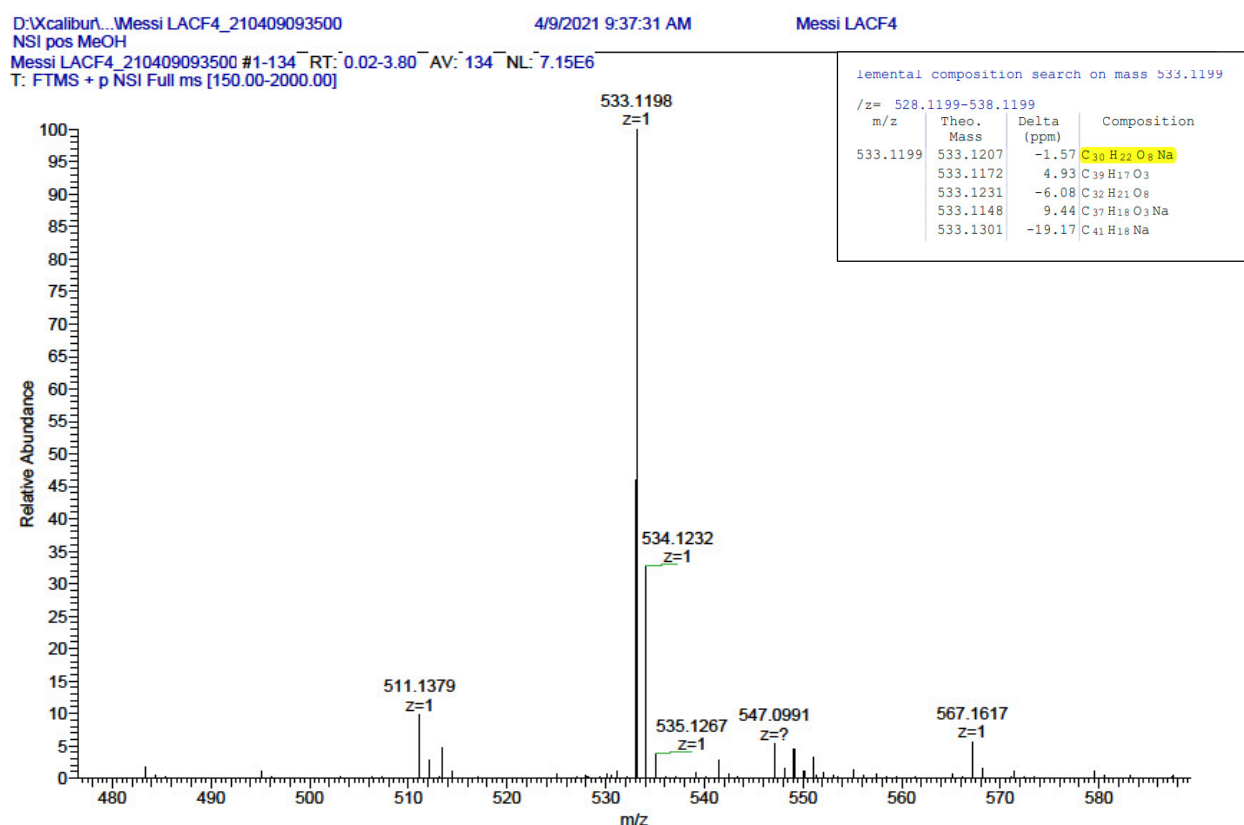

Figure S1. HRESIMS spectrum of compound 1.

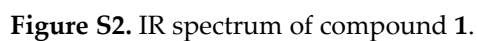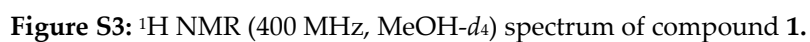

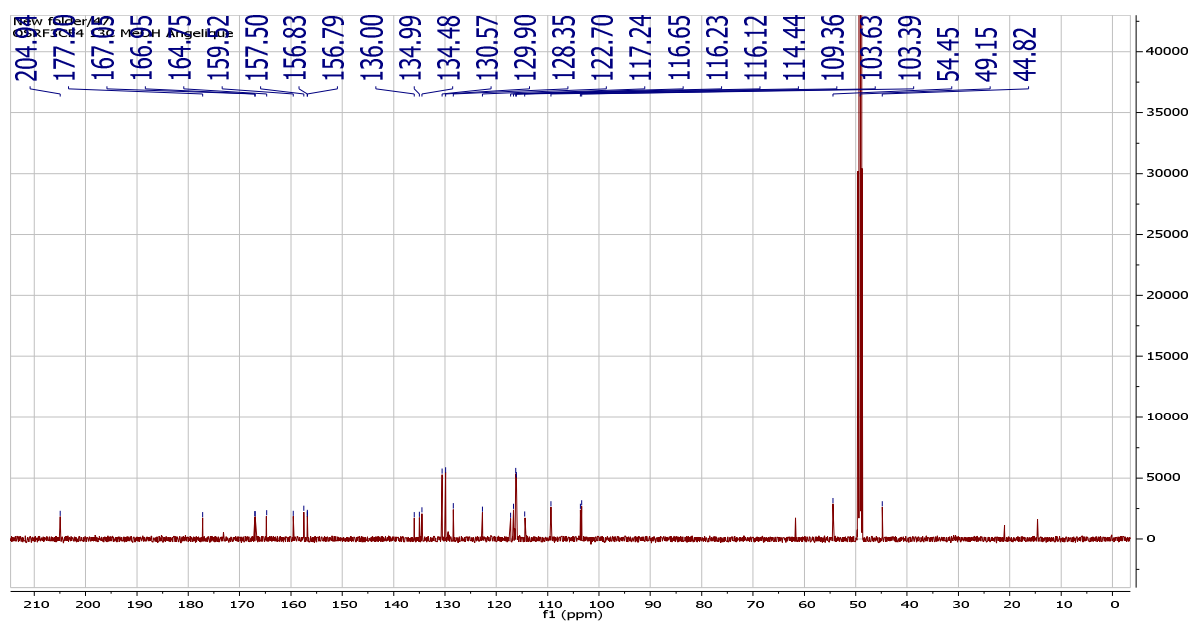

Figure S4. <sup>13</sup>C NMR (100 MHz, MeOH-*d*<sub>4</sub>) spectrum of compound 1.

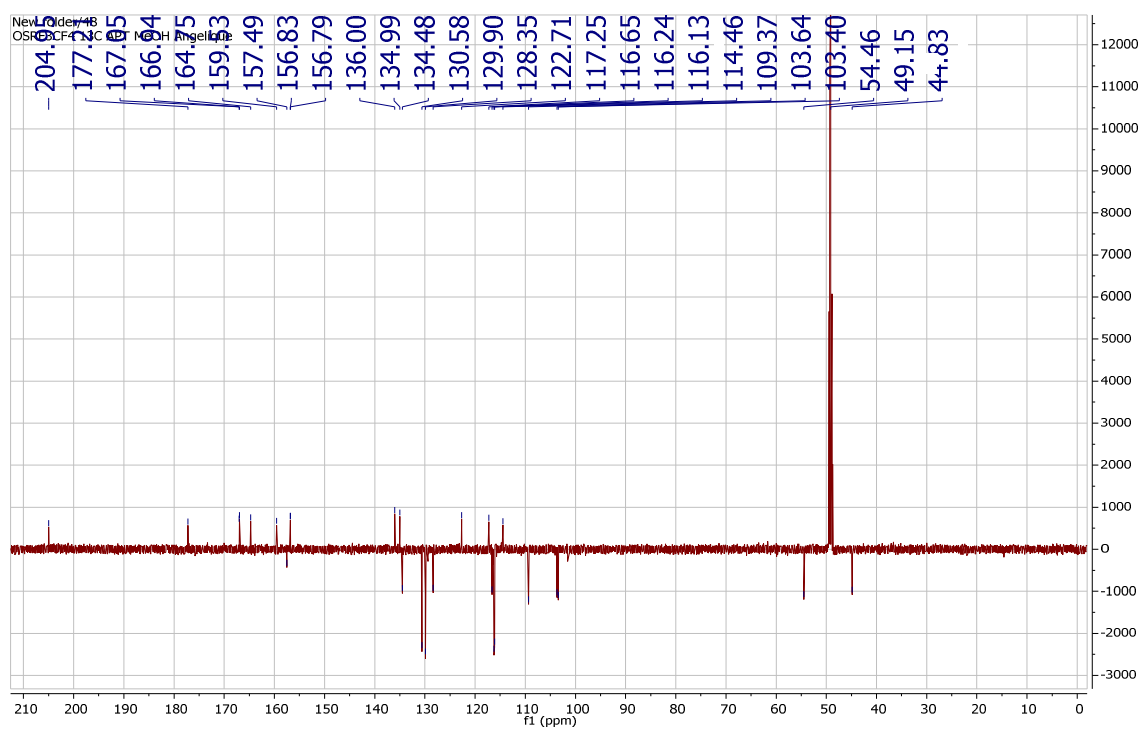

Figure S5. APT (100 MHz, MeOH-*d*<sub>4</sub>) spectrum of compound 1.

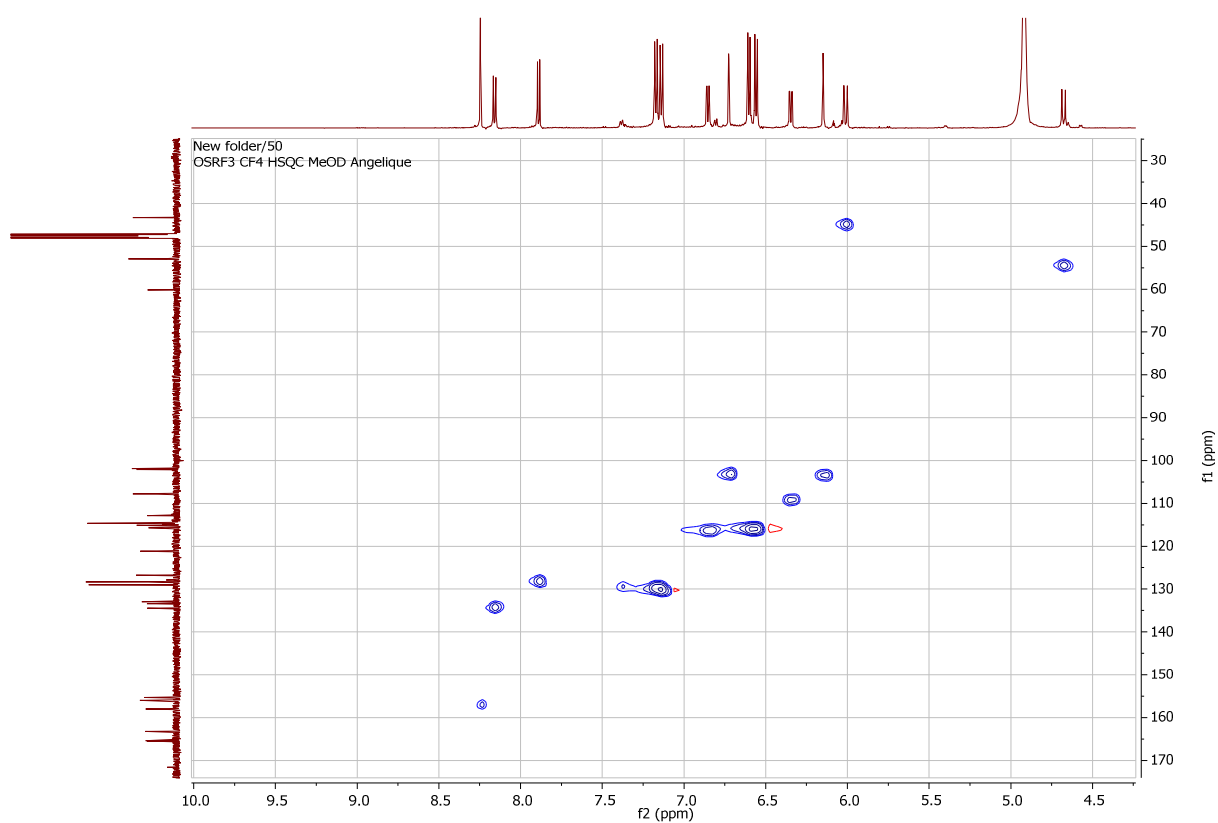

Figure S6. HSQC spectrum of compound 1.

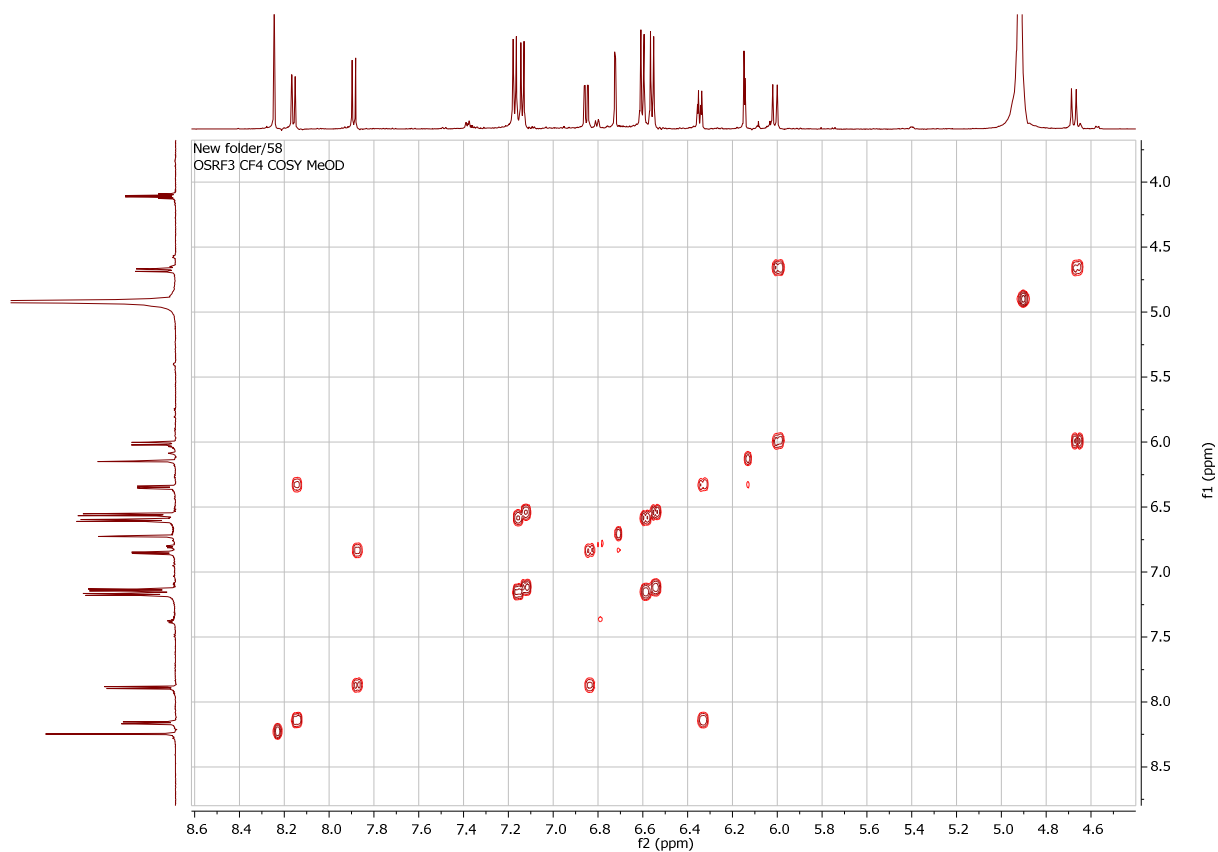

Figure S7. COSY spectrum of compound 1.

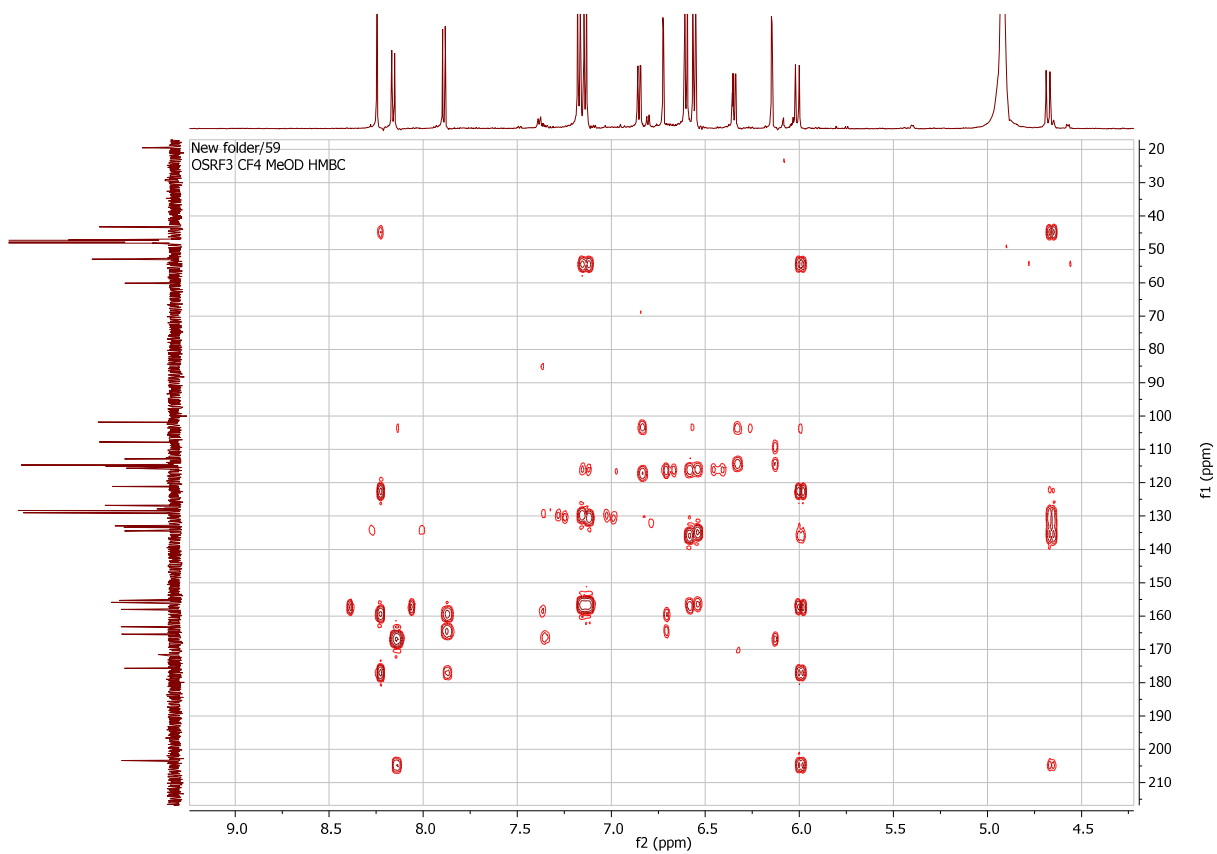

**Figure S8.** HMBC spectrum of compound **1**.

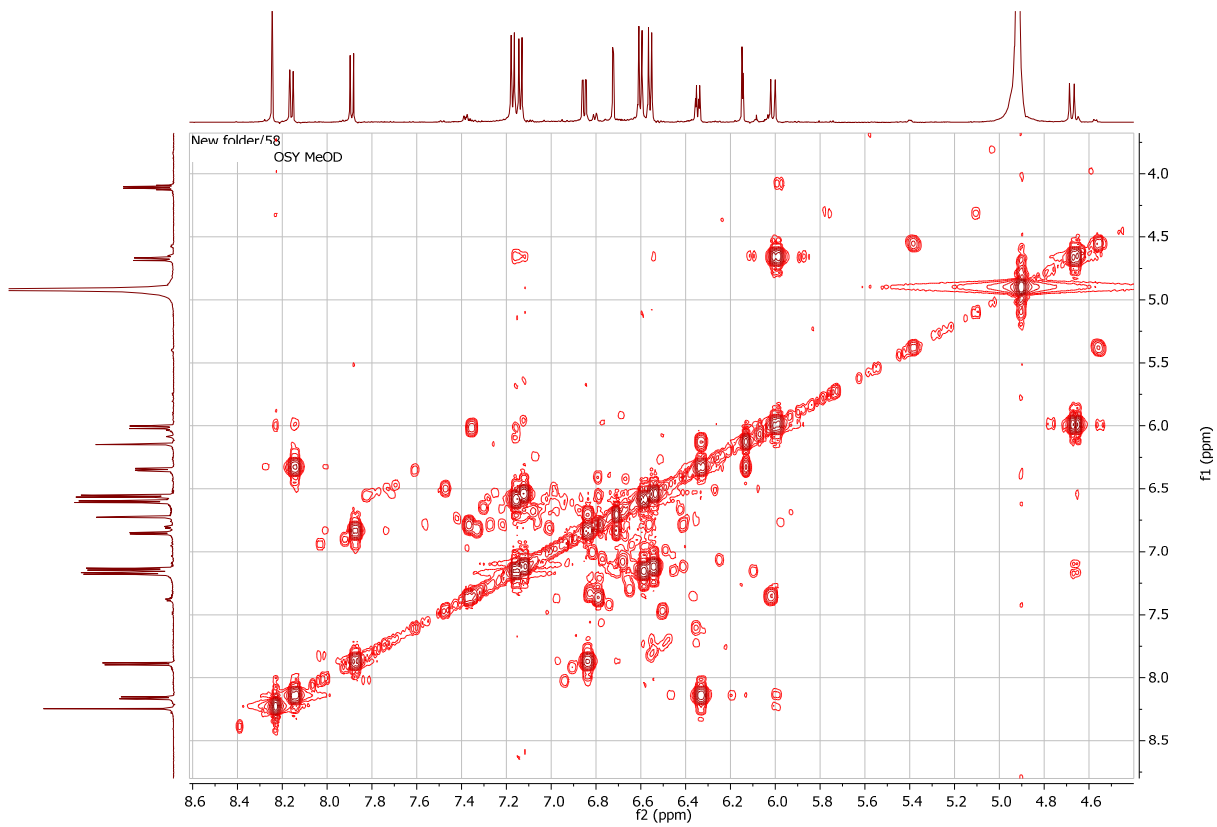

**Figure S9.** ROESY spectrum of compound **1**.

## Compound 2

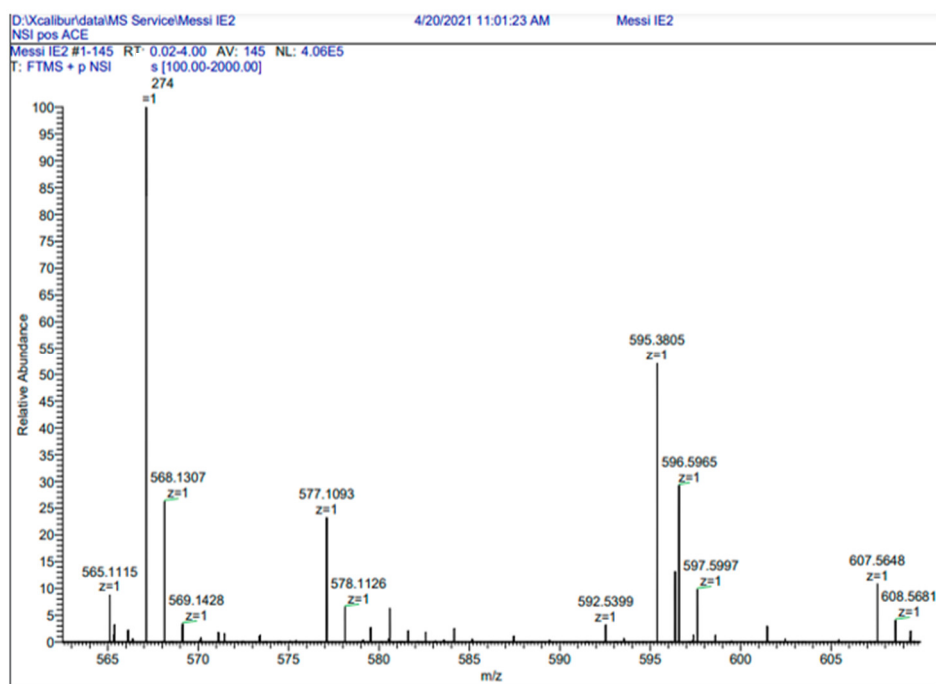

Figure S10. ESIMS Spectrum of compound 2.

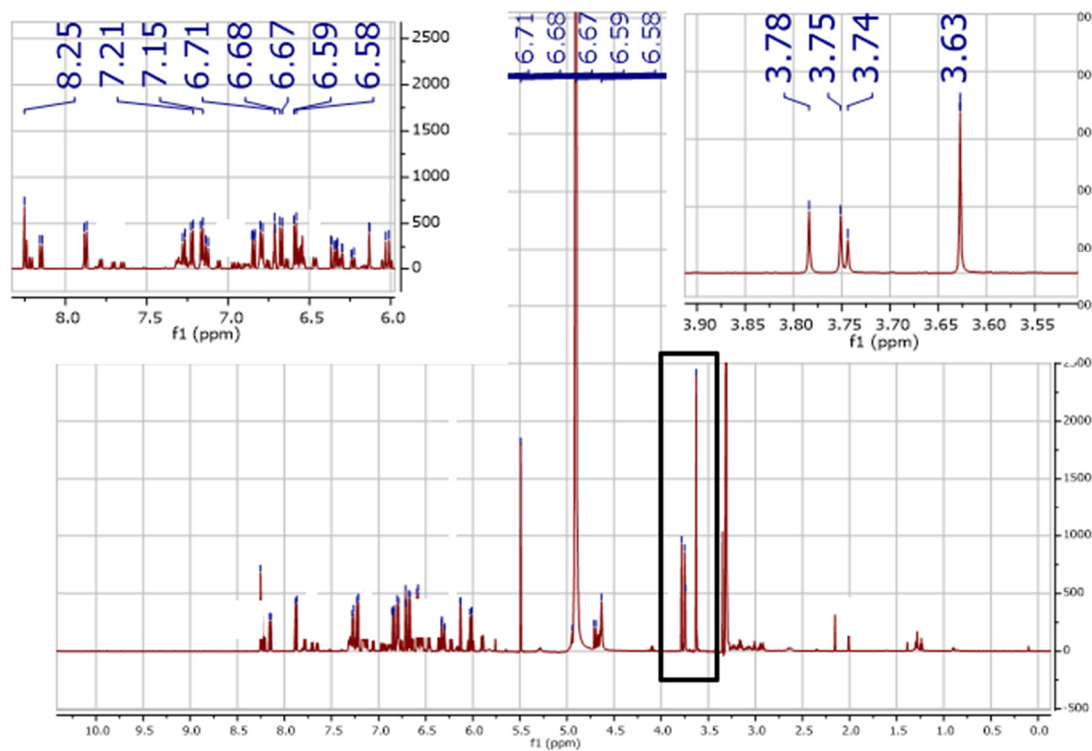

Figure S11. <sup>1</sup>H NMR (400 MHz, MeOH-d<sub>4</sub>) spectrum of compound 2.

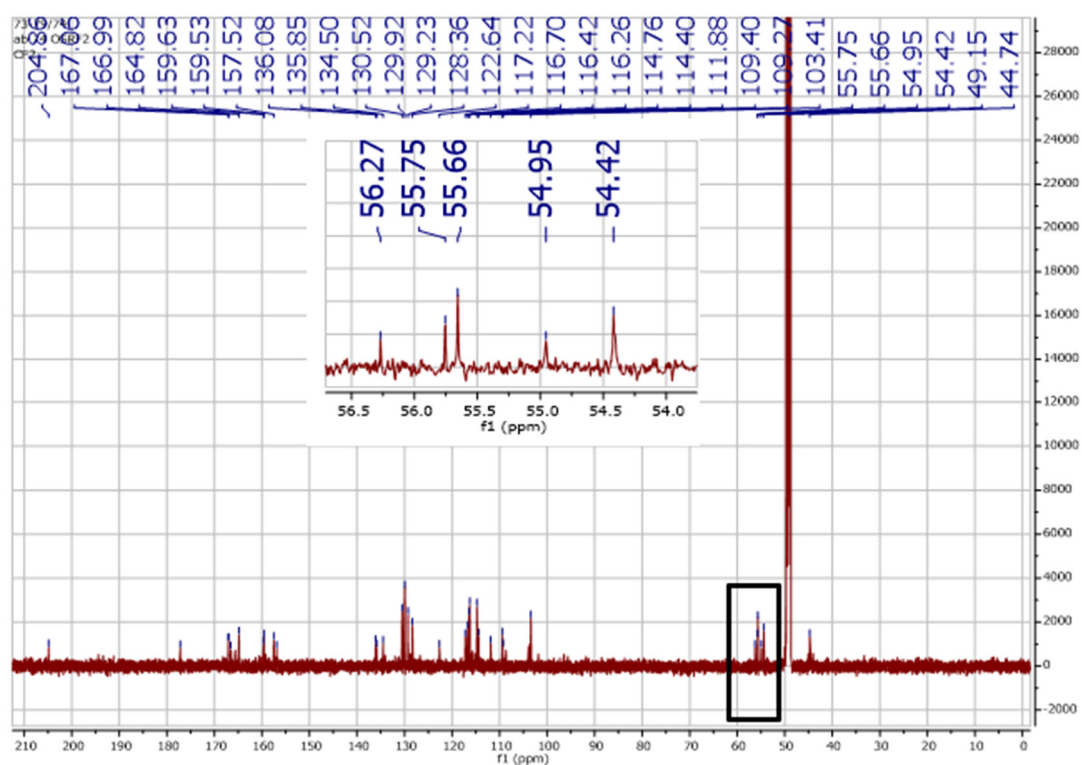

Figure S12. <sup>13</sup>C NMR (100 MHz, MeOH-*d*<sub>4</sub>) spectrum of compound 2.

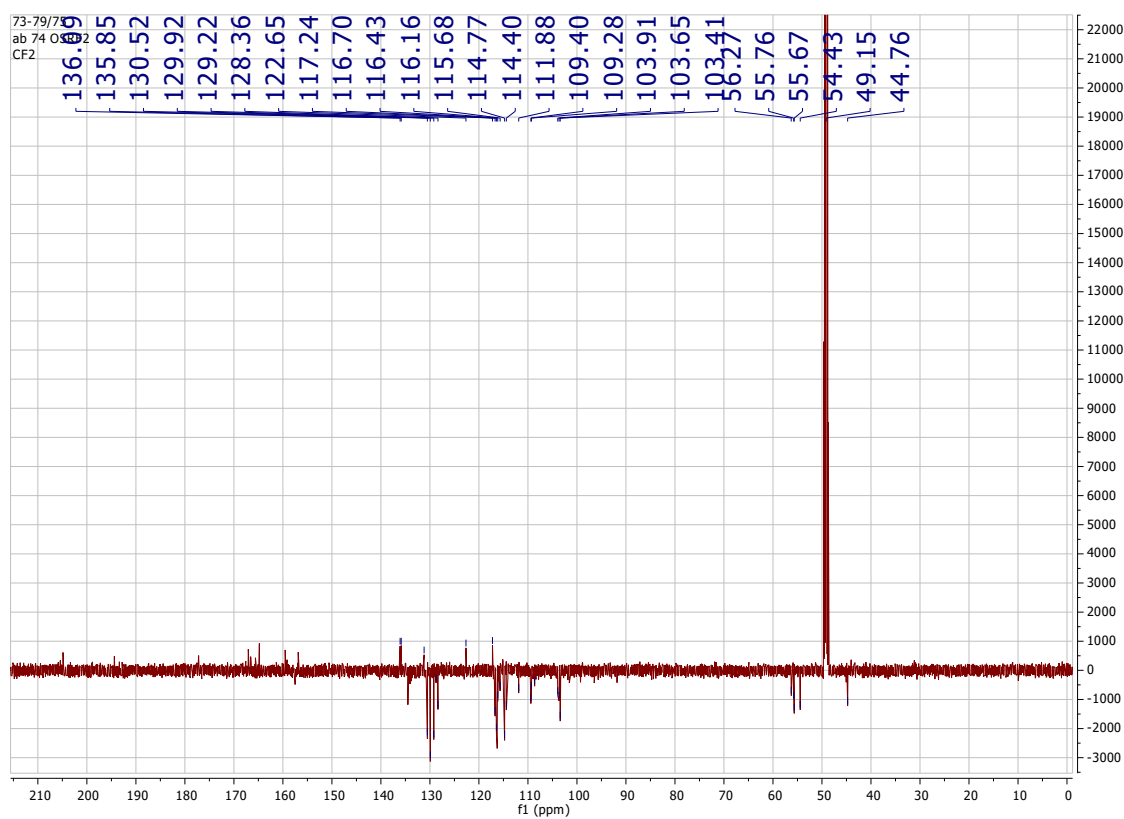

Figure S13. APT (100 MHz, MeOH-*d*<sub>4</sub>) spectrum of compound 2.

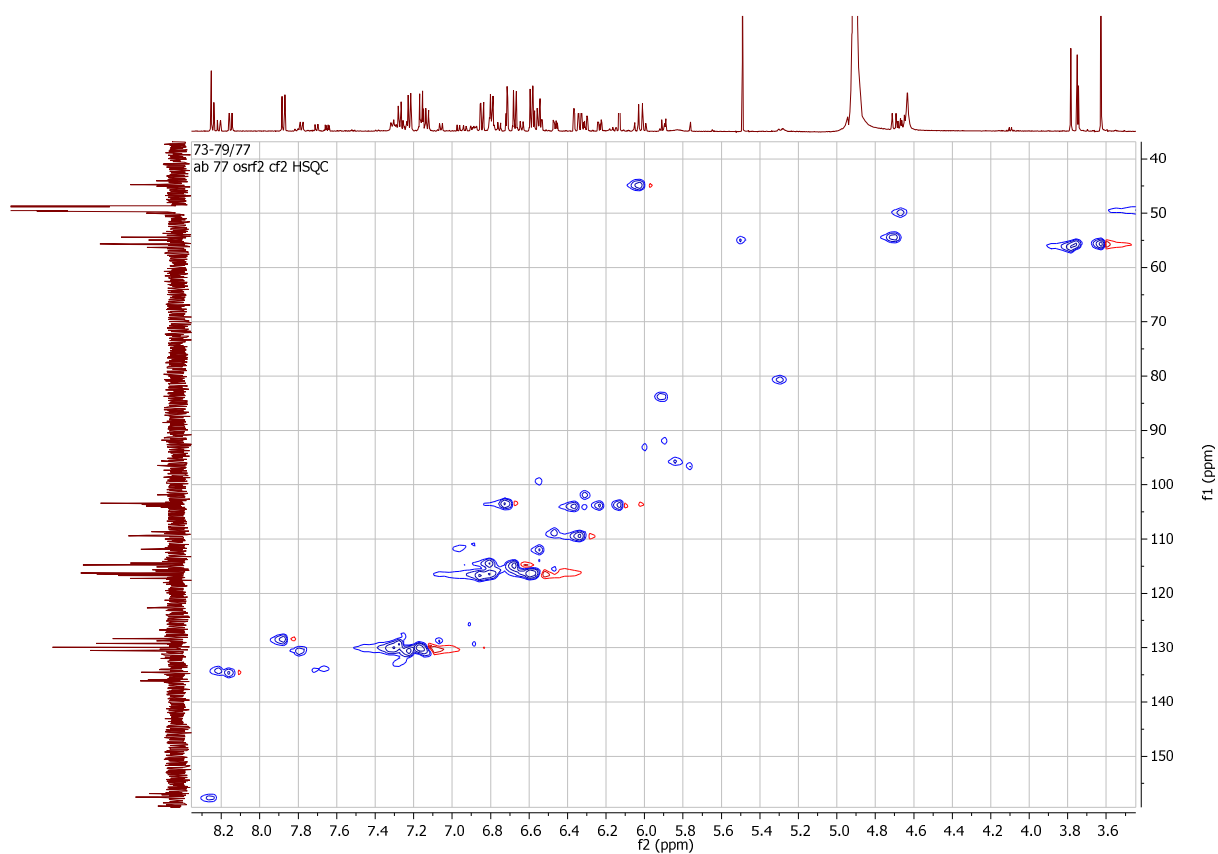

Figure S14. HSQC spectrum of compound 2.

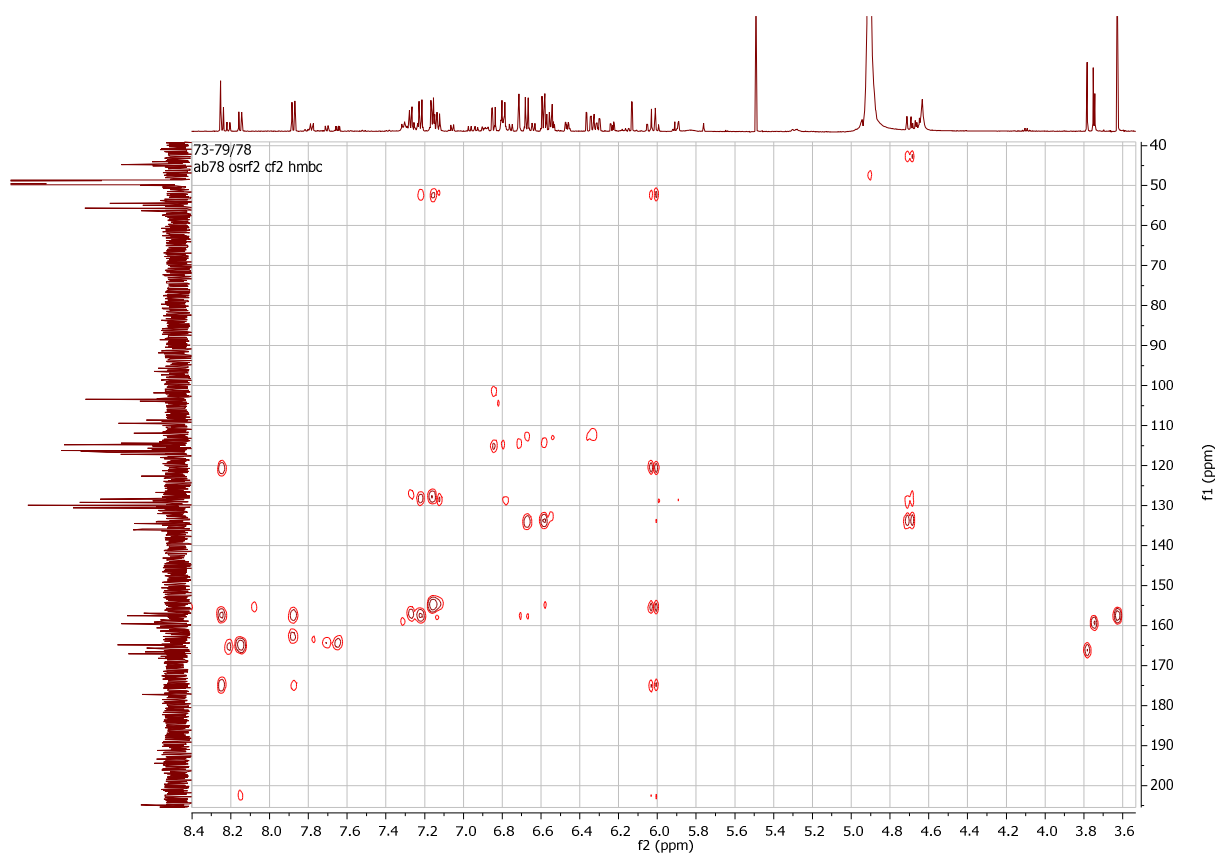



**Figure S15.** HMBC spectrum of compound 2.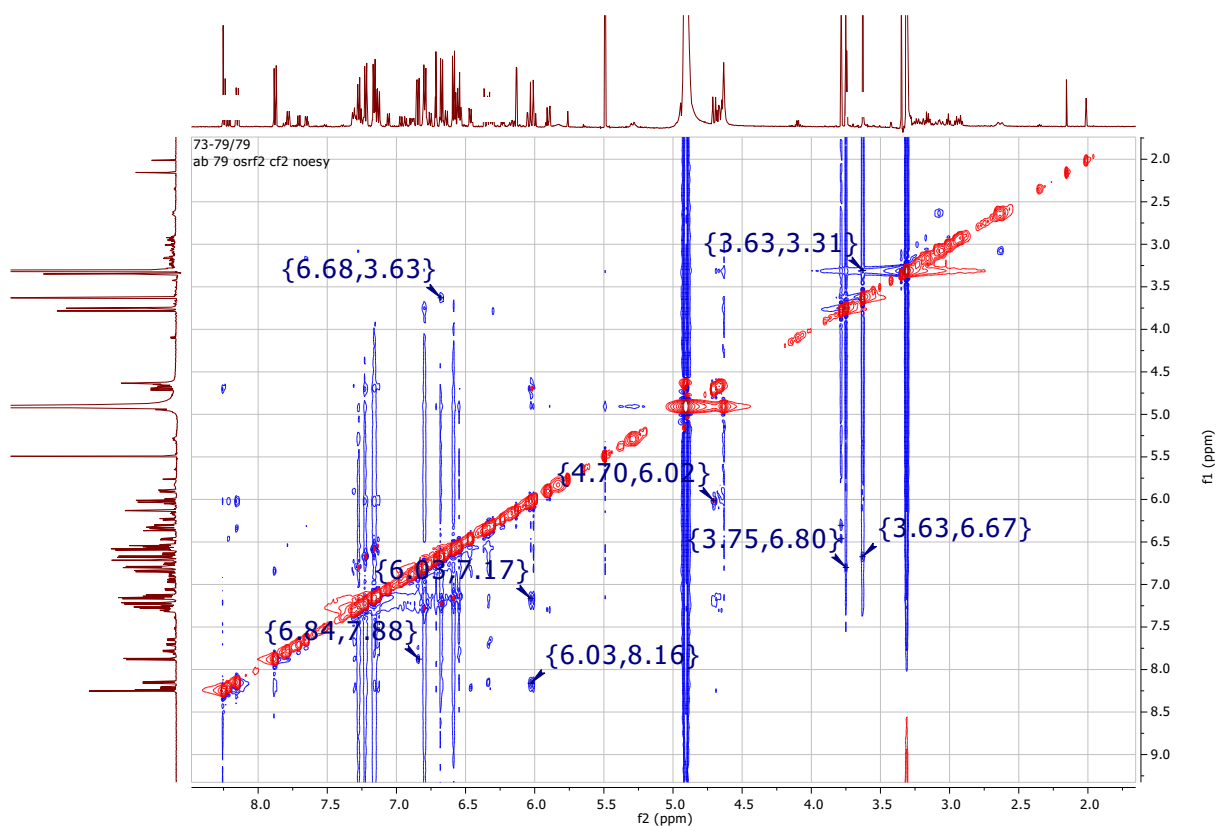**Figure S16.** ROESY spectrum of compound 2.

### Compound 3

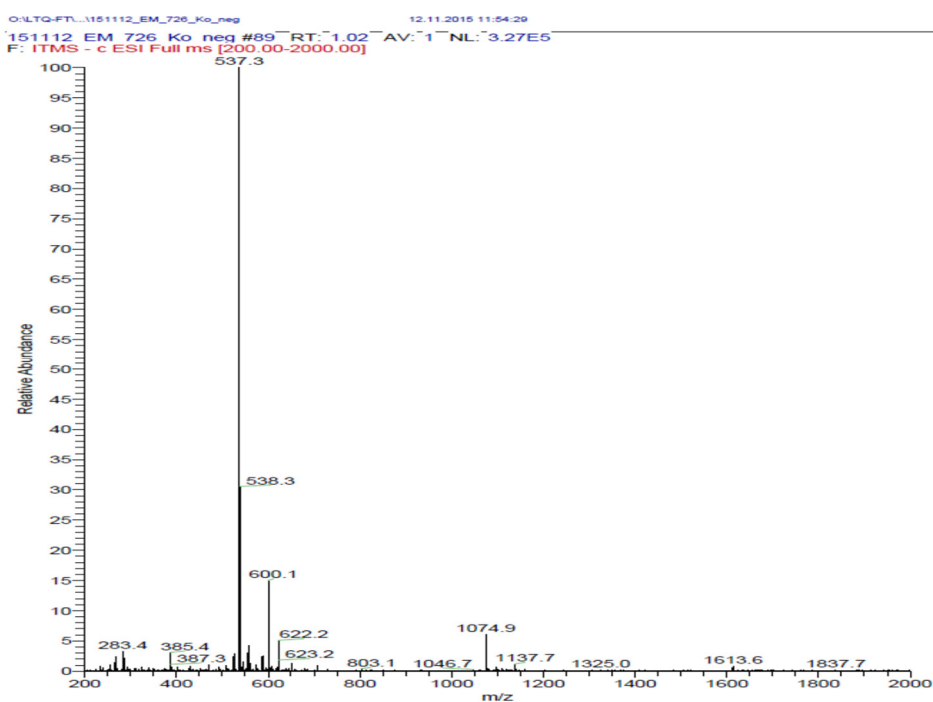**Figure S17.** ESIMS Spectrum of compound 3.

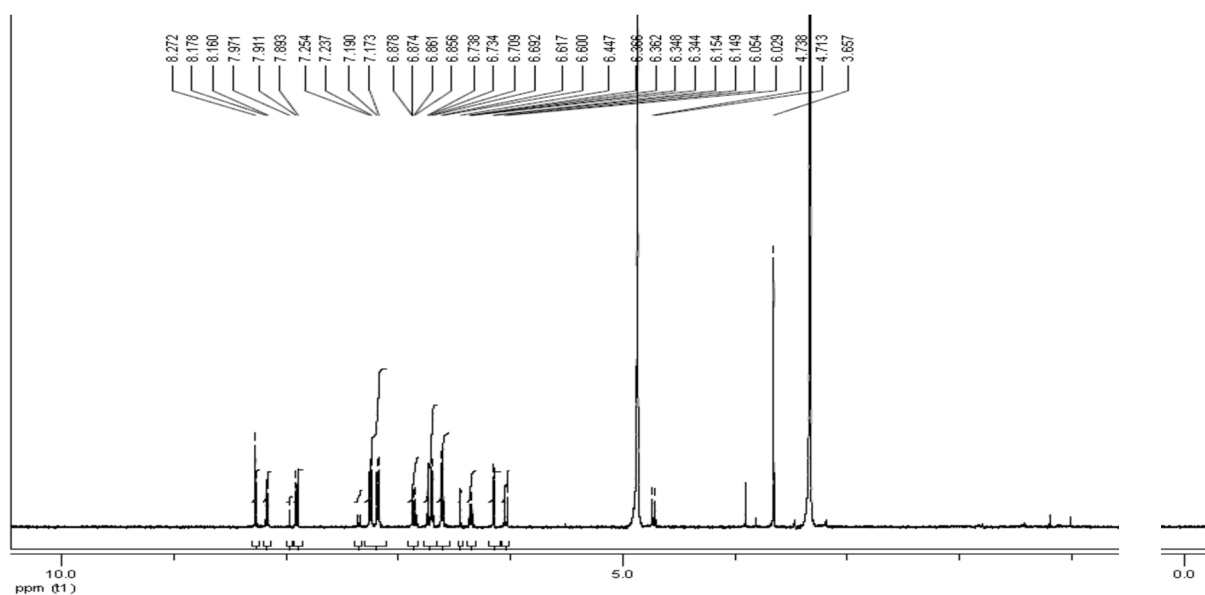

**Figure S18.** <sup>1</sup>H NMR (400 MHz, MeOH-*d*<sub>4</sub>) spectrum of compound 3.

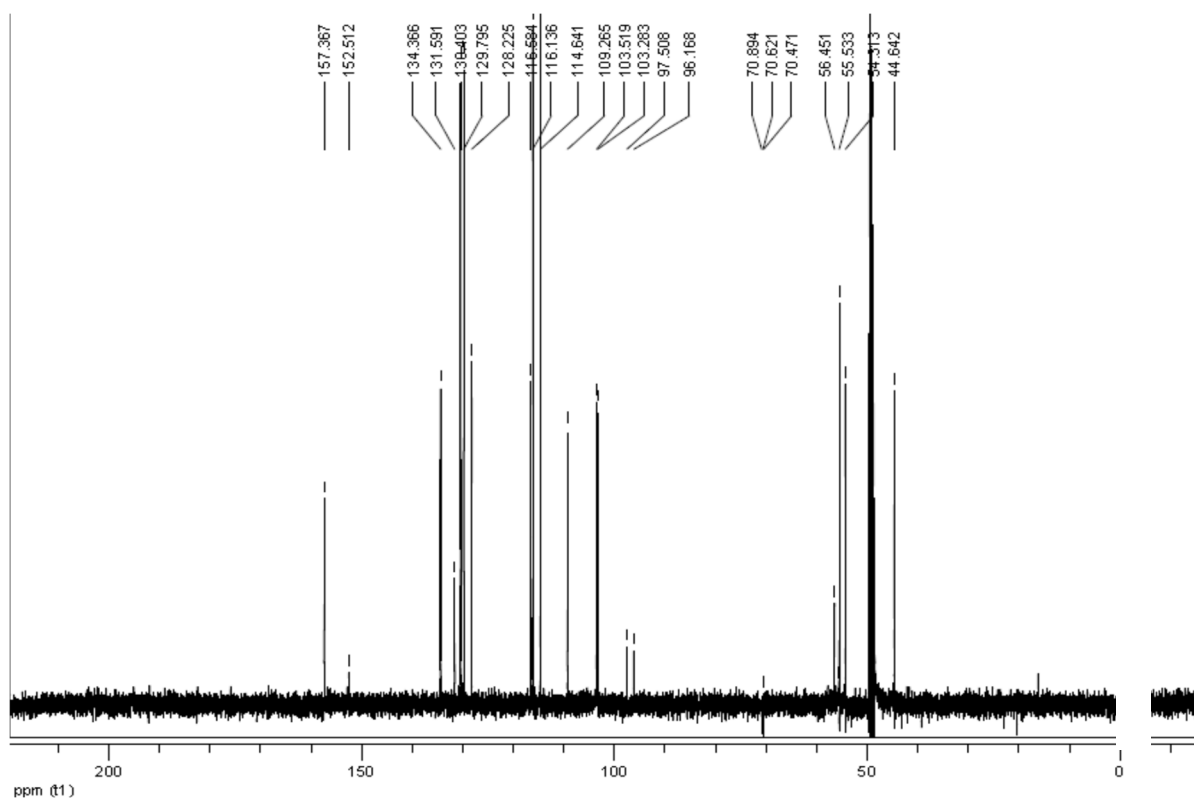

**Figure S19.** DEPT (100 MHz, MeOH-*d*<sub>4</sub>) spectrum of compound 3.

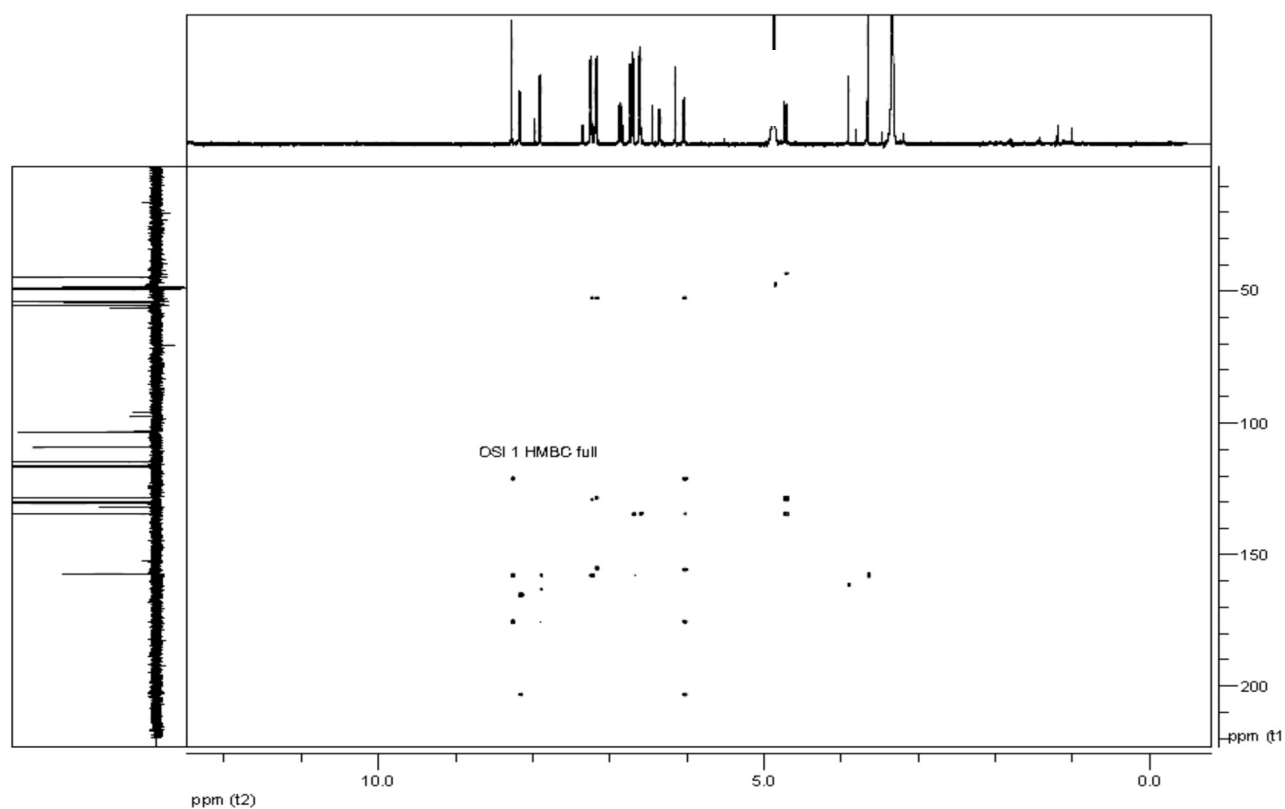

Figure S20. HMBC spectrum of compound 3.

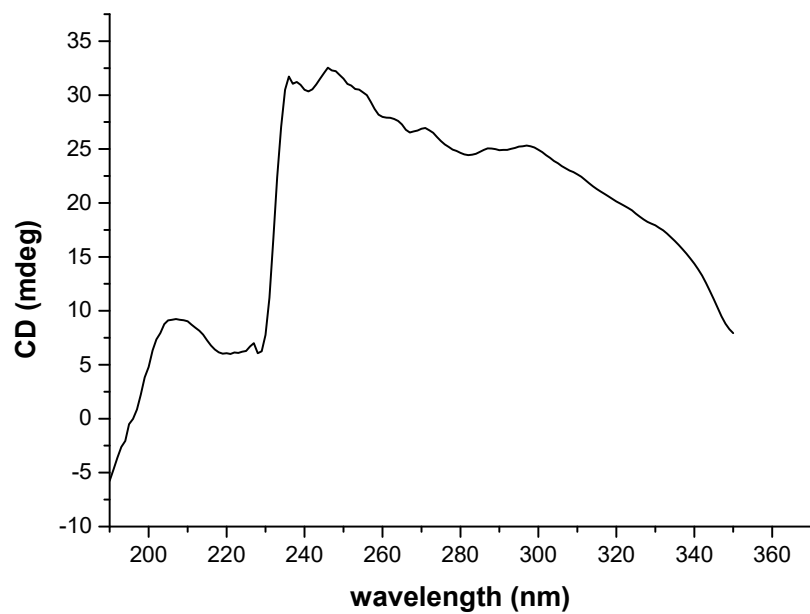

Figure S21. Experimental CD of compound 1.

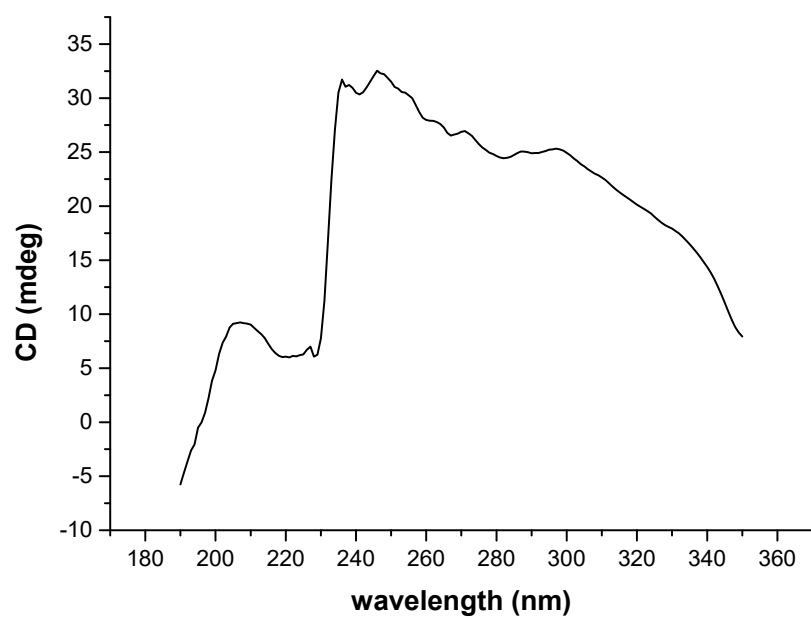

**Figure S22.** Experimental CD of compound 2.
